# Supplementary material for: Combined Impacts of Physical Activity, Dietary Variety, and Social Interaction on Incident Functional Disability in Older Japanese Adults
Source: PubMed Central journal article supplement (PMC10257989; doi:10.2188/jea.je20210392), 2023-07-05
Supplement: je-33-350-s001.pdf [file je-33-350-s001.pdf]

**eTable 1.** Multilevel survival analyses of independent associations of each MVPA, dietary variety, and social interaction with incident disability, excluding individuals who developed disability that occurred during the first year of follow-up (n=7,531)

| Variables included simultaneously in the same model | Number of events/participants | Incidence rate per 1,000 person-years | Model 1 |             |          | Model 2 |             |          | Model 3 |             |          | Model 4 |             |          | PAF, % (95% CI)<br>Insufficiency<br>→sufficiency |
|-----------------------------------------------------|-------------------------------|---------------------------------------|---------|-------------|----------|---------|-------------|----------|---------|-------------|----------|---------|-------------|----------|--------------------------------------------------|
|                                                     |                               |                                       | HR      | (95% CI)    | <i>P</i> | HR      | (95% CI)    | <i>P</i> | HR      | (95% CI)    | <i>P</i> | HR      | (95% CI)    | <i>P</i> |                                                  |
| <b>MVPA</b>                                         |                               |                                       |         |             |          |         |             |          |         |             |          |         |             |          |                                                  |
| Insufficiency                                       | 244/1,555                     | 49.3                                  | 1.00    | (Ref.)      |          | 1.00    | (Ref.)      |          | 1.00    | (Ref.)      |          | 1.00    | (Ref.)      |          | 6.7 (4.5–9.0)                                    |
| Sufficiency                                         | 511/5,976                     | 26.7                                  | 0.60    | (0.51–0.70) | <0.001   | 0.61    | (0.52–0.72) | <0.001   | 0.64    | (0.55–0.75) | <0.001   | 0.67    | (0.57–0.79) | <0.001   |                                                  |
| <b>Dietary variety</b>                              |                               |                                       |         |             |          |         |             |          |         |             |          |         |             |          |                                                  |
| Insufficiency                                       | 329/3,215                     | 26.4                                  | 1.00    | (Ref.)      |          | 1.00    | (Ref.)      |          | 1.00    | (Ref.)      |          | 1.00    | (Ref.)      |          | 2.0 (-4.4 to 8.0)                                |
| Sufficiency                                         | 426/4,316                     | 25.3                                  | 0.90    | (0.78–1.05) | 0.17     | 0.95    | (0.82–1.11) | 0.51     | 0.95    | (0.82–1.11) | 0.55     | 0.95    | (0.82–1.11) | 0.54     |                                                  |
| <b>Social interaction</b>                           |                               |                                       |         |             |          |         |             |          |         |             |          |         |             |          |                                                  |
| Insufficiency                                       | 301/2,415                     | 29.9                                  | 1.00    | (Ref.)      |          | 1.00    | (Ref.)      |          | 1.00    | (Ref.)      |          | 1.00    | (Ref.)      |          |                                                  |
| Sufficiency                                         | 454/5,116                     | 21.0                                  | 0.76    | (0.66–0.89) | < 0.001  | 0.79    | (0.68–0.93) | 0.003    | 0.83    | (0.71–0.97) | 0.020    | 0.86    | (0.73–1.00) | 0.052    | 4.6 (0.2–8.9)                                    |

CI, confidence interval; HR, hazard ratio; IADL, instrumental activities of daily living; MVPA, moderate-to-vigorous intensity physical activity; PAF, population-attributable fraction.

Total MVPA time  $\geq 150$  minutes/week, dietary variety (Dietary Variety Score)  $\geq 3$ , and social interaction (apart from cohabiting family members)  $\geq 1$  time/week were defined as sufficiency, respectively.

Model 1: Adjusted for age and sex.

Model 2: Adjusted for variables in model 1, plus living situation, marital status, education, equivalent income, body mass index, hypertension, hyperlipidemia, heart disease, stroke, diabetes mellitus, cancer, alcohol drinking status, and smoking status.

Model 3: Adjusted for variables in model 2, plus depressive mood, lower back pain, knee pain, and sitting time.

Model 4: Adjusted for variables in model 3, plus IADL dependency.

**eTable 2.** Multilevel survival analyses of associations of combinations of MVPA, dietary variety, and social interactions with incident disability, excluding individuals who developed disability that occurred during the first year of follow-up (n=7,531)

| Combination categories                      | Number of events/<br>participants | Incidence rate per 1,000 person-years | Model 1 |             |          | Model 2 |             |          | Model 3 |             |          | Model 4 |             |          | PAF, % (95% CI)               |               |
|---------------------------------------------|-----------------------------------|---------------------------------------|---------|-------------|----------|---------|-------------|----------|---------|-------------|----------|---------|-------------|----------|-------------------------------|---------------|
|                                             |                                   |                                       | HR      | 95% CI      | <i>P</i> | HR      | 95% CI      | <i>P</i> | HR      | 95% CI      | <i>P</i> | HR      | 95% CI      | <i>P</i> | Insufficiency<br>→sufficiency |               |
| Number of satisfying behaviors              |                                   |                                       |         |             |          |         |             |          |         |             |          |         |             |          |                               |               |
| Not satisfying any behaviors                | 73/415                            | 60.8                                  | 1.00    | (Ref.)      |          | 1.00    | (Ref.)      |          | 1.00    | (Ref.)      |          | 1.00    | (Ref.)      |          |                               |               |
| Satisfying any one behavior                 | 190/1,536                         | 42.3                                  | 0.73    | (0.56–0.96) | 0.025    | 0.75    | (0.57–0.98) | 0.036    | 0.75    | (0.57–0.98) | 0.038    | 0.80    | (0.61–1.06) | 0.12     | 4.2                           | (-0.7 to 8.8) |
| Satisfying any two behaviors                | 275/2,868                         | 32.3                                  | 0.53    | (0.41–0.69) | <0.001   | 0.56    | (0.43–0.73) | <0.001   | 0.59    | (0.45–0.77) | <0.001   | 0.64    | (0.49–0.84) | 0.001    | 9.5                           | (3.9–14.8)    |
| Satisfying all three behaviors              | 217/2,712                         | 26.8                                  | 0.41    | (0.32–0.54) | <0.001   | 0.46    | (0.35–0.61) | <0.001   | 0.50    | (0.38–0.66) | <0.001   | 0.56    | (0.42–0.74) | <0.001   | 14.0                          | (5.1–22.0)    |
|                                             | 755/7,531                         | 33.8                                  |         | Trend       | <0.001   |         | Trend       | <0.001   |         | Trend       | <0.001   |         | Trend       | <0.001   |                               |               |
| Combination pattern of satisfying behaviors |                                   |                                       |         |             |          |         |             |          |         |             |          |         |             |          |                               |               |
| Not satisfying any behaviors                | 73/415                            | 60.8                                  | 1.00    | (Ref.)      |          | 1.00    | (Ref.)      |          | 1.00    | (Ref.)      |          | 1.00    | (Ref.)      |          |                               |               |
| Only MVPA                                   | 79/827                            | 32.3                                  | 0.60    | (0.44–0.83) | 0.002    | 0.61    | (0.44–0.84) | 0.003    | 0.61    | (0.44–0.84) | 0.003    | 0.66    | (0.48–0.92) | 0.013    |                               |               |
| Only dietary variety                        | 52/272                            | 66.6                                  | 0.93    | (0.65–1.33) | 0.70     | 0.95    | (0.67–1.37) | 0.80     | 0.93    | (0.65–1.33) | 0.68     | 0.94    | (0.66–1.35) | 0.73     |                               |               |
| Only social interaction                     | 59/437                            | 46.6                                  | 0.81    | (0.58–1.15) | 0.24     | 0.84    | (0.60–1.19) | 0.33     | 0.86    | (0.61–1.21) | 0.41     | 0.95    | (0.67–1.33) | 0.76     |                               |               |

|                                             |           |      |      |             |        |      |             |        |      |             |        |      |             |        |
|---------------------------------------------|-----------|------|------|-------------|--------|------|-------------|--------|------|-------------|--------|------|-------------|--------|
| MVPA + dietary variety                      | 97/901    | 36.2 | 0.56 | (0.41–0.75) | <0.001 | 0.60 | (0.44–0.81) | 0.001  | 0.62 | (0.45–0.85) | 0.003  | 0.67 | (0.49–0.92) | 0.013  |
| Dietary variety + social interaction        | 60/431    | 47.5 | 0.68 | (0.48–0.96) | 0.027  | 0.74 | (0.52–1.05) | 0.09   | 0.74 | (0.52–1.06) | 0.10   | 0.78 | (0.55–1.11) | 0.16   |
| MVPA + social interaction                   | 118/1,536 | 25.9 | 0.46 | (0.34–0.62) | <0.001 | 0.48 | (0.36–0.65) | <0.001 | 0.52 | (0.39–0.70) | <0.001 | 0.57 | (0.42–0.77) | <0.001 |
| MVPA + dietary variety + social interaction | 217/2,712 | 26.8 | 0.42 | (0.32–0.55) | <0.001 | 0.47 | (0.35–0.61) | <0.001 | 0.50 | (0.38–0.67) | <0.001 | 0.56 | (0.42–0.74) | <0.001 |
|                                             | 755/7,531 | 33.8 |      |             |        |      |             |        |      |             |        |      |             |        |

CI, confidence interval; DVS, dietary variety score; HR, hazard ratio; IADL, instrumental activities of daily living; MVPA, moderate-to-vigorous intensity physical activity; PAF, population-attributable fraction.

Total MVPA time  $\geq 150$  minutes/week, dietary variety (Dietary Variety Score)  $\geq 3$ , and social interaction (apart from cohabiting family members)  $\geq 1$  time/week were defined as sufficiency, respectively.

Model 1: Adjusted for age and sex.

Model 2: Adjusted for variables in model 1, plus living situation, marital status, education, equivalent income, body mass index, hypertension, hyperlipidemia, heart disease, stroke, diabetes mellitus, cancer, alcohol drinking status, and smoking status.

Adjusted for variables in model 2, plus depressive mood, lower back pain, knee pain, and sitting time.

Model 4: Adjusted for variables in model 3, plus IADL dependency.
